# Supplementary material for: Characteristics of DOM and Their Relationships with Potentially Toxic Elements in the Inner Mongolia Section of the Yellow River, China
Source: MDPI journal article supplement (doi:10.3390/toxics12040250), 2024-03-29
Supplement: s1 [file s1]

# Characteristics of DOM and Their Relationships with Potentially Toxic Elements in the Inner Mongolia Section of the Yellow River, China

Kuo Wang <sup>1</sup>, Juan Jiang <sup>1,2</sup>, Yuanrong Zhu <sup>1,\*</sup>, Qihao Zhou <sup>1</sup>, Xiaojie Bing <sup>1,3</sup>, Yidan Tan <sup>1</sup>, Yuyao Wang <sup>1</sup> and Ruiqing Zhang <sup>4</sup>

<sup>1</sup> State Key Laboratory of Environment Criteria and Risk Assessment, Chinese Research Academy of Environmental Sciences, Beijing 100012, China; wangkuo21@mails.ucas.ac.cn (K.W.); jiangjuan20@mails.ucas.ac.cn (J.J.); zhouqihao23@mails.ucas.ac.cn (Q.Z.); bingxiaojie0830@foxmail.com (X.B.); tanyidan22@mails.ucas.ac.cn (Y.T.); 2022223082@nwnu.edu.cn (Y.W.)

<sup>2</sup> College of Environment, Hohai University, Nanjing 210098, China

<sup>3</sup> School of Energy and Environmental Engineering, University of Science and Technology Beijing, Beijing 100083, China

<sup>4</sup> School of Ecology and Environment, Inner Mongolia University, Hohhot 010021, China; zruqing2007@126.com

\* Correspondence: zhuyuanrong07@mails.ucas.ac.cn

## Contents of this file:

1. Supplementary figures: Figures S1 to S2
2. Supplementary tables: Tables S1 to S5

## 1. Supplementary figures

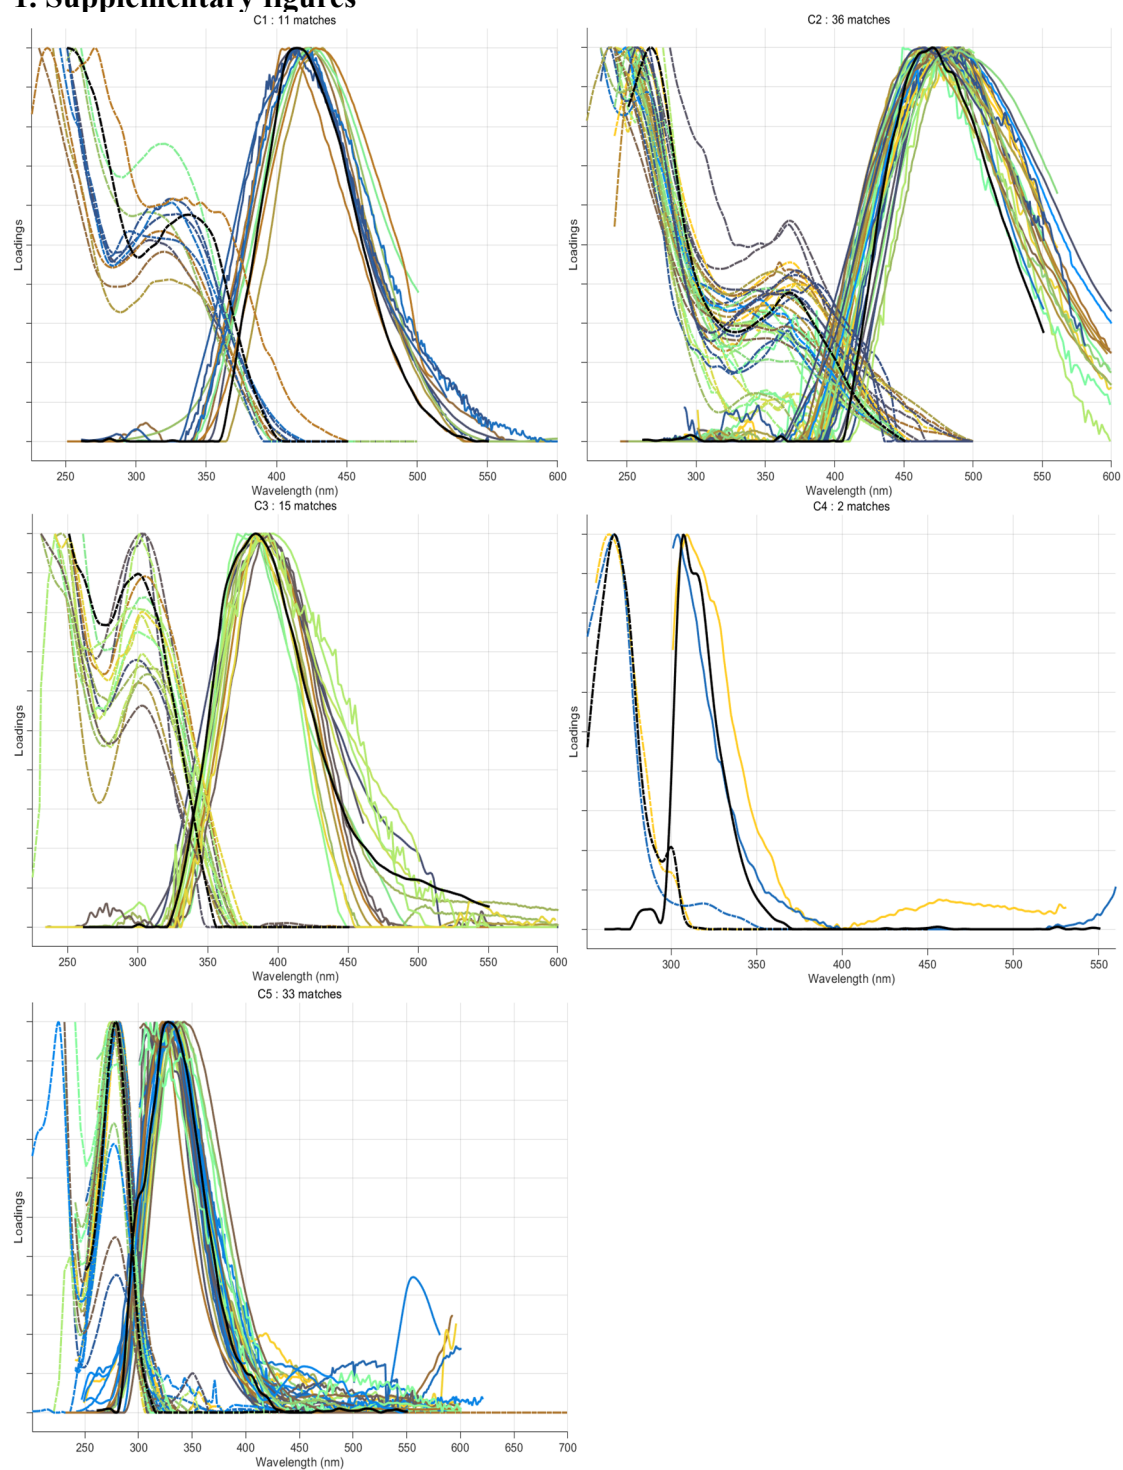

**Figure S1.** Comparison of a five component PARAFAC model with other models in the OpenFluor database.

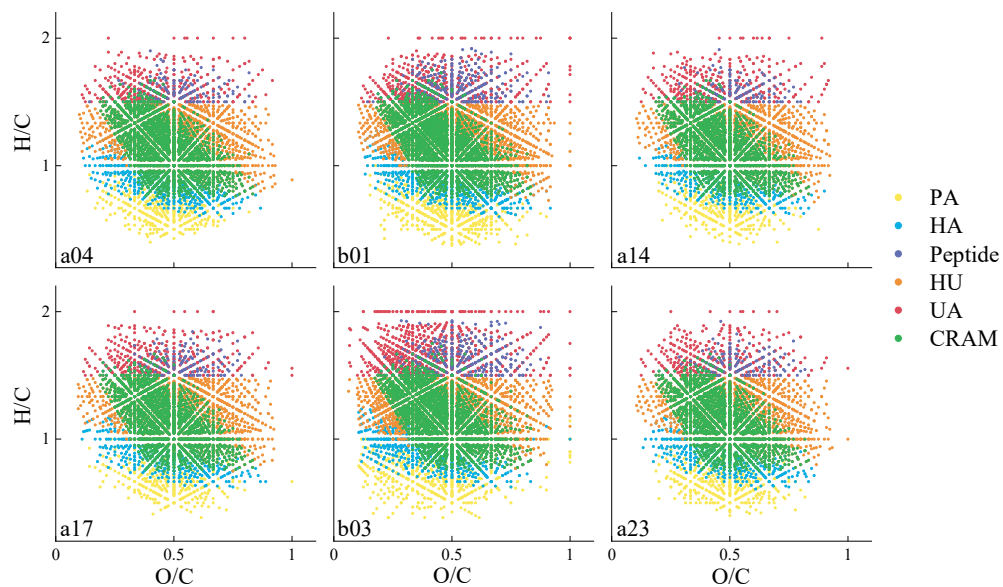

**Figure S2.** The upstream site a04 (a) of the Inner Mongolia section, the dividing point between the upstream and the midstream is b01 (b), the midstream site a14 (c) and a17 (d), the dividing point between the midstream and the downstream b03 (e) and the downstream site a23 (f) Van-Krevelen diagram of DOM molecular species.

## 2. Supplementary tables

**Table S1.** The coordinates of the sampling sites.

| site | longitude | latitude  |
|------|-----------|-----------|
| a01  | 106.75821 | 39.372927 |
| a02  | 106.75194 | 39.473607 |
| a03  | 106.73872 | 39.594979 |
| a04  | 106.77411 | 39.641377 |
| a05  | 106.75853 | 39.71133  |
| a06  | 106.7279  | 39.969442 |
| a07  | 106.99353 | 40.237236 |
| a08  | 107.14128 | 40.379223 |
| a09  | 107.39219 | 40.677372 |
| a10  | 107.83146 | 40.840393 |
| a11  | 108.22322 | 40.812539 |
| a12  | 108.77514 | 40.609023 |
| a13  | 109.45261 | 40.523634 |
| a14  | 109.69301 | 40.486958 |
| a15  | 109.7379  | 40.494965 |
| a16  | 109.81894 | 40.512722 |
| a17  | 109.93629 | 40.53017  |
| a18  | 110.17223 | 40.551991 |
| a19  | 110.30368 | 40.492117 |
| a20  | 110.51171 | 40.390094 |
| a21  | 110.65702 | 40.306282 |
| a22  | 110.79203 | 40.264576 |
| a23  | 110.96158 | 40.27816  |
| a24  | 111.04583 | 40.295506 |
| a25  | 111.20516 | 40.197321 |
| a26  | 111.30063 | 40.156748 |
| a27  | 111.37792 | 40.07396  |
| a28  | 111.41519 | 39.997048 |
| b01  | 108.73668 | 40.635658 |
| b02  | 109.78406 | 40.647034 |
| b03  | 109.98041 | 40.530991 |

**Table S2.** Element detection limit, Two-time element concentration data (Site a18, b03) and their standard deviation.

|    | Detection limit | Site a18        |                 |        | Site b03        |                 |        |
|----|-----------------|-----------------|-----------------|--------|-----------------|-----------------|--------|
|    |                 | Concentration-1 | Concentration-2 | SD     | Concentration-1 | Concentration-2 | SD     |
|    |                 | ug/L            | ug/L            |        | ug/L            | ug/L            |        |
| Sb | 0.15            | 0.818           | 0.758           | 0.03   | 1.252           | 1.253           | 0.0005 |
| Mo | 0.06            | 2.532           | 2.937           | 0.2025 | 14.798          | 14.947          | 0.0745 |
| As | 0.12            | 2.472           | 2.516           | 0.022  | 2.17            | 2.275           | 0.0525 |
| Zn | 0.67            | 0.198           | 0.168           | 0.015  | 9.066           | 9.215           | 0.0745 |
| Cu | 0.08            | 1.925           | 1.909           | 0.008  | 1.374           | 1.494           | 0.06   |
| Ni | 0.06            | 0.106           | 0.103           | 0.0015 | 12.146          | 12.667          | 0.2605 |
| Co | 0.03            | 0.059           | 0.052           | 0.0035 | 2.008           | 2.052           | 0.022  |
| Mn | 0.12            | <0.000          | <0.000          | --     | 0.69            | 0.785           | 0.0475 |
| Cr | 0.11            | 0.108           | 0.117           | 0.0045 | 0.205           | 0.207           | 0.001  |
| V  | 0.08            | 2.088           | 2.168           | 0.04   | 4.588           | 4.569           | 0.0095 |
| Al | 1.15            | 2.891           | 2.841           | 0.025  | 5.705           | 6.084           | 0.1895 |
| Se | 0.41            | 0.606           | 0.618           | 0.006  | 2.939           | 2.598           | 2.939  |
| Ga | 0.02            | 0.023           | 0.016           | 0.0035 | 0.209           | 0.179           | 0.209  |
| W  | 0.43            | 0.283           | 0.259           | 0.012  | 1.817           | 1.773           | 1.817  |
| Hg | 0.10            | 0.018           | 0.003           | 0.0075 | 0.020           | 0.013           | 0.020  |
| Pb | 0.09            | 0.045           | 0.007           | 0.019  | 0.053           | 0.036           | 0.053  |
| Tl | 0.02            | 0.005           | 0.002           | 0.0015 | 0.004           | 0.004           | 0.004  |
| Zr | 0.04            | 0.056           | 0.024           | 0.016  | 0.207           | 0.097           | 0.207  |
| Ti | 0.46            | <0.000          | 0.122           | --     | 0.205           | 0.087           | 0.205  |
| Fe | 0.82            | 2.710           | <0.000          | --     | 15.119          | 14.130          | 15.119 |
| Pd | 0.02            | 0.015           | 0.013           | 0.001  | 0.033           | 0.029           | 0.033  |

**Table S3.** Descriptive analysis of DOM fluorescence components and related parameters in the upper, middle, and lower reaches of the Inner Mongolia section.

| Parameters    | Upstream        | b01  | Midstream       | b03   | Downstream      |
|---------------|-----------------|------|-----------------|-------|-----------------|
| Peak B        | $0.66 \pm 0.10$ | 0.56 | $0.66 \pm 0.12$ | 2.10  | $2.52 \pm 0.22$ |
| Peak T        | $0.89 \pm 0.16$ | 0.70 | $0.88 \pm 0.12$ | 3.92  | $1.72 \pm 0.18$ |
| Peak A        | $1.49 \pm 0.13$ | 1.44 | $1.59 \pm 0.23$ | 2.53  | $1.68 \pm 0.09$ |
| Peak M        | $0.95 \pm 0.09$ | 0.95 | $1.07 \pm 0.21$ | 2.69  | $1.14 \pm 0.06$ |
| Peak C        | $0.81 \pm 0.08$ | 0.82 | $0.86 \pm 0.16$ | 1.66  | $0.92 \pm 0.05$ |
| $\Sigma$ Peak | $4.80 \pm 0.44$ | 4.47 | $5.06 \pm 0.79$ | 12.89 | $7.98 \pm 0.43$ |
| C1            | $0.96 \pm 0.09$ | 0.91 | $0.97 \pm 0.16$ | /     | $1.02 \pm 0.06$ |
| C2            | $0.69 \pm 0.06$ | 0.63 | $0.76 \pm 0.10$ | /     | $0.82 \pm 0.04$ |
| C3            | $0.57 \pm 0.08$ | 0.61 | $0.70 \pm 0.15$ | /     | $0.73 \pm 0.04$ |
| C4            | $0.20 \pm 0.04$ | 0.26 | $0.21 \pm 0.07$ | /     | $3.11 \pm 0.31$ |
| C5            | $0.80 \pm 0.17$ | 0.58 | $0.76 \pm 0.09$ | /     | $1.23 \pm 0.18$ |
| $\Sigma$ Fmax | $3.21 \pm 0.29$ | 2.98 | $3.39 \pm 0.54$ | /     | $6.93 \pm 0.34$ |
| FI            | $2.43 \pm 0.07$ | 2.28 | $2.40 \pm 0.04$ | 2.91  | $2.35 \pm 0.06$ |
| BIX           | $0.86 \pm 0.04$ | 0.92 | $0.89 \pm 0.02$ | 1.17  | $0.92 \pm 0.03$ |
| HIX           | $0.76 \pm 0.02$ | 0.76 | $0.76 \pm 0.01$ | 0.60  | $0.46 \pm 0.03$ |

**Table S4.** The proportion of the number and relative intensity of different molecular formulas and different molecular species in the six DOM samples relative to the total number of molecules and the total intensity

| Parameters         | Sample |       |       |       |       |       |
|--------------------|--------|-------|-------|-------|-------|-------|
|                    | a04    | b01   | a14   | a17   | b03   | a23   |
| Number of formulas | 4402   | 6719  | 4026  | 4194  | 6620  | 4166  |
| CHO                | 2066   | 2456  | 1858  | 1951  | 2451  | 1944  |
| % Formulas         | 46.93  | 36.55 | 46.15 | 46.52 | 37.02 | 46.66 |
| % Intensity        | 74.73  | 66.75 | 72.66 | 73.84 | 53.28 | 73.36 |
| CHON               | 1765   | 2576  | 1577  | 1627  | 2434  | 1645  |
| % Formulas         | 40.10  | 38.34 | 39.17 | 38.79 | 36.77 | 39.49 |
| % Intensity        | 19.63  | 18.44 | 20.81 | 19.78 | 16.71 | 20.36 |
| CHOS               | 478    | 1097  | 483   | 494   | 1202  | 472   |
| % Formulas         | 10.86  | 16.33 | 12.00 | 11.78 | 18.16 | 11.33 |
| % Intensity        | 5.20   | 12.61 | 5.92  | 5.78  | 28.09 | 5.75  |
| CHONS              | 93     | 590   | 108   | 122   | 533   | 105   |
| % Formulas         | 2.11   | 8.78  | 2.68  | 2.91  | 8.05  | 2.52  |
| % Intensity        | 0.45   | 2.20  | 0.61  | 0.60  | 1.93  | 0.53  |
| PA                 | 477    | 838   | 438   | 434   | 704   | 482   |
| % Formulas         | 10.84  | 12.47 | 10.88 | 10.35 | 10.63 | 11.57 |
| % Intensity        | 3.42   | 2.52  | 3.40  | 3.08  | 3.23  | 3.57  |
| HA                 | 710    | 946   | 593   | 638   | 849   | 641   |
| % Formulas         | 16.13  | 14.08 | 14.73 | 15.21 | 12.82 | 15.39 |
| % Intensity        | 9.22   | 6.25  | 8.66  | 8.45  | 5.59  | 8.91  |
| HU                 | 2578   | 3738  | 2372  | 2463  | 3473  | 2404  |
| % Formulas         | 58.56  | 55.63 | 58.92 | 58.73 | 52.46 | 57.71 |
| % Intensity        | 78.38  | 78.83 | 78.35 | 78.81 | 65.44 | 78.00 |
| UA                 | 464    | 787   | 457   | 480   | 1123  | 466   |
| % Formulas         | 10.54  | 11.71 | 11.35 | 11.44 | 16.96 | 11.19 |
| % Intensity        | 7.87   | 10.95 | 8.29  | 8.36  | 23.03 | 8.24  |
| Peptide            | 172    | 404   | 166   | 179   | 457   | 172   |
| % Formulas         | 3.91   | 6.01  | 4.12  | 4.27  | 6.90  | 4.13  |
| % Intensity        | 1.11   | 1.40  | 1.30  | 1.30  | 2.57  | 1.28  |
| CRAM               | 2320   | 3181  | 2072  | 2170  | 2980  | 2152  |
| % Formulas         | 52.70  | 47.34 | 51.47 | 51.74 | 45.02 | 51.66 |
| % Intensity        | 64.63  | 58.23 | 62.66 | 63.52 | 55.37 | 63.61 |

**Table S5.** Distribution of heavy metal concentrations in the upper, middle, and lower reaches of the Inner Mongolia section of the Yellow River Basin

| Type                   | Parameters<br>Detection limit | Al<br>1.15 | V<br>0.08 | Cr<br>0.11 | Mn<br>0.12 | Co<br>0.03 | Ni<br>0.06 | Cu<br>0.08 | Zn<br>0.67 | As<br>0.12 | Mo<br>0.06 | Sb<br>0.15 |
|------------------------|-------------------------------|------------|-----------|------------|------------|------------|------------|------------|------------|------------|------------|------------|
| Upstream<br>(n = 11)   | Max                           | 3.176      | 2.027     | 5.247      | 29.704     | 0.278      | 1.735      | 1.210      | 2.829      | 3.863      | 4.985      | 1.470      |
|                        | Min                           | 1.573      | 1.376     | 2.822      | 0.295      | 0.112      | 1.203      | 0.884      | 0.711      | 2.603      | 2.287      | 0.657      |
|                        | Mean                          | 2.053      | 1.743     | 4.643      | 6.374      | 0.164      | 1.429      | 1.019      | 1.444      | 3.299      | 3.073      | 0.981      |
|                        | SD                            | 0.420      | 0.238     | 0.695      | 8.852      | 0.045      | 0.140      | 0.099      | 0.625      | 0.402      | 0.761      | 0.250      |
| b01                    | --                            | 6.899      | 1.970     | 5.580      | 1.383      | 0.238      | 1.318      | 1.079      | 2.338      | 13.861     | 3.419      | 1.247      |
| Midstream<br>(n = 6)   | Max                           | 5.062      | 2.479     | 5.142      | 4.368      | 0.157      | 1.243      | 1.433      | 2.505      | 7.406      | 2.812      | 1.185      |
|                        | Min                           | 1.315      | 1.749     | 3.536      | 0.248      | 0.114      | 1.096      | 1.164      | 0.850      | 2.501      | 2.005      | 0.778      |
|                        | Mean                          | 2.427      | 2.096     | 4.005      | 2.401      | 0.136      | 1.161      | 1.344      | 1.542      | 3.554      | 2.441      | 0.903      |
|                        | SD                            | 1.297      | 0.287     | 0.524      | 1.327      | 0.014      | 0.047      | 0.088      | 0.579      | 1.731      | 0.273      | 0.141      |
| b03                    | --                            | 6.084      | 4.569     | 6.622      | 82.145     | 2.199      | 12.583     | 1.168      | 7.835      | 3.702      | 14.947     | 1.253      |
| Downstream<br>(n = 11) | Max                           | 2.891      | 2.311     | 4.071      | 5.469      | 0.155      | 1.511      | 2.640      | 3.250      | 3.019      | 2.532      | 1.616      |
|                        | Min                           | 1.331      | 1.352     | 3.455      | 1.161      | 0.116      | 1.176      | 1.526      | 0.807      | 2.637      | 1.967      | 0.818      |
|                        | Mean                          | 1.909      | 1.737     | 3.679      | 2.542      | 0.135      | 1.281      | 1.812      | 1.942      | 2.803      | 2.132      | 1.001      |
|                        | SD                            | 0.462      | 0.295     | 0.195      | 1.392      | 0.013      | 0.111      | 0.387      | 0.724      | 0.126      | 0.175      | 0.255      |
| Mainstream<br>(n = 28) | Max                           | 5.062      | 2.479     | 5.247      | 29.704     | 0.278      | 1.735      | 2.640      | 3.250      | 7.406      | 4.985      | 1.616      |
|                        | Min                           | 1.315      | 1.352     | 2.822      | 0.248      | 0.112      | 1.096      | 0.884      | 0.711      | 2.501      | 1.967      | 0.657      |
|                        | Mean                          | 2.078      | 1.819     | 4.109      | 3.930      | 0.146      | 1.309      | 1.414      | 1.669      | 3.154      | 2.549      | 0.972      |
|                        | SD                            | 0.736      | 0.298     | 0.660      | 5.793      | 0.033      | 0.150      | 0.423      | 0.657      | 0.908      | 0.644      | 0.219      |
|                        | SV                            | 0.354      | 0.164     | 0.161      | 1.474      | 0.223      | 0.114      | 0.299      | 0.394      | 0.288      | 0.253      | 0.225      |
